# Supplementary material
Source: HighWire-hosted journal article supplement (https://n.neurology.org/content/suppl/2014/04/22/WNL.0b013e31829bfd8f)
Supplement: farrell.pdf [file farrell.pdf]

# Utilizando nanopartículas de óxido de hierro para diagnosticar enfermedades inflamatorias del SNC y LPSNC

Brian T. Farrell, MD,  
PhD  
Bronwyn E. Hamilton,  
MD  
Edit Dósa, MD, PhD  
Endre Rimely, MD  
Morad Nasser, MD  
Seymour Gahramanov,  
MD  
Cynthia A. Lacy, BSN  
Eugene P. Frenkel, MD  
Nancy D. Doolittle, PhD  
Paula M. Jacobs, PhD  
Edward A. Neuwelt, MD

Dirección para correspondencia al  
Dr. Neuwelt:  
neuwelt@ohsu.edu

## RESUMEN

**Objetivo:** El objetivo del estudio fue evaluar los beneficios y limitaciones potenciales de la utilización de nanopartículas superparamagnéticas ultrapequeñas de óxido de hierro (SPUOH) en el diagnóstico por RM de enfermedades inflamatorias del SNC y linfoma primario del SNC.

**Métodos:** Veinte pacientes con lesiones supuestas o conocidas del SNC fueron estudiados con RM. Dieciocho pacientes recibieron agentes de contraste basados en gadolinio (ACBG) y 1 de 2 agentes de contraste del tipo SPUOH (ferumoxitol y ferumoxtran-10) luego de 24 horas, que permitió un análisis comparativo directo. Los otros 2 pacientes fueron estudiados solamente con RM con contraste con SPUOH por contraindicación renal a los ACBG. Se adquirieron secuencias convencionales de RM T1 y T2 antes y después de la administración de contraste en todos los pacientes y se realizó una RM de perfusión para evaluar el volumen sanguíneo cerebral relativo (VSCr) en 9 pacientes que recibieron ferumoxitol.

**Resultados:** La RM con contraste del tipo SPUOH mostró igual número de lesiones cerebrales que realizaban con contraste en 9 de 18 pacientes (50%), más lesiones con realce en 2 de 18 pacientes (11%) y menos lesiones con realce en 3 de 18 pacientes (17%), en comparación con la RM con ACBG. No hubo realce en la RM en 4 de 18 pacientes (22%). La perfusión dinámica por RM con contraste endovenoso utilizando ferumoxitol mostró bajo VSCr (razón < 1,0) en 3 casos de desmielinización o inflamación, VSCr modestamente elevado en 5 casos de linfoma o enfermedad linfoproliferativa del SNC (rango: 1,3 – 4,1) y 1 caso de enfermedad no medible.

**Conclusiones:** Este estudio mostró que la RM de cerebro con contraste de tipo SPUOH puede ser útil en el diagnóstico de enfermedades inflamatorias y linfoma del SNC y también es útil en pacientes con compromiso renal con riesgo de fibrosis sistémica nefrogénica que no pueden recibir ACBG. *Neurology*® 2013;81:256-263

## GLOSARIO

**ACBG** = agente de contraste basado en gadolinio; **ELPT** = enfermedad linfoproliferativa post-trasplante; **FSN** = fibrosis sistémica nefrogénica; **LPSNC** = linfoma primario del SNC; **LSNC** = linfoma del SNC; **PDC** = perfusión dinámica con contraste; **PWI** = secuencia de perfusión; **SPUOH** = nanopartícula superparamagnética ultrapequeña de óxido de hierro; **VSCr** = volumen sanguíneo cerebral relativo.

El linfoma del SNC representa un desafío diagnóstico.<sup>1-9</sup> La RM típicamente muestra un nódulo único o múltiples nódulos en la profundidad del parénquima que realzan con el contraste EV.<sup>5,9-11</sup> Desafortunadamente, el LPSNC imita a otras enfermedades en las imágenes de rutina, entre las que se incluyen las metástasis en el SNC de un cáncer sistémico, los gliomas y la desmielinización, y esto lleva frecuentemente a conductas quirúrgicas agresivas y/o retraso en el diagnóstico tisular y el tratamiento.<sup>12-14</sup> La obtención de un diagnóstico tisular de la forma menos invasiva es de importancia crítica, ya que el LPSNC es típicamente quimiosensible, infiltrativo y, con frecuencia, de localización profunda en el parénquima cerebral.<sup>15,16</sup>

El uso de un agente de contraste basado en gadolinio (ACBG) permite realizar la secuencia de RM de T1 con contraste, ya que el ACBG penetra a través de la barrera hematoencefálica incompetente. Por el contrario, las nanopartículas superparamagnéticas ultra pequeñas de óxido de hierro (SPUOH) actúan como agentes de acumulación de sangre inmediatamente luego de su administración, para luego ser recaptadas por las células inflamatorias (por ej., macrófagos), actuando como un agente de contraste intracelular, con realce parenquimatoso anormal, con un pico a las 24 horas después de su administración.<sup>17</sup> En este estudio evaluamos tanto los beneficios como

De los Departments of Neurosurgery (B.T.F., E.A.N.), Radiology (B.E.H.), y Neurology (E.D., E.R., M.N., S.G., C.A.L., N.D.D., E.A.N.), Oregon Health & Science University, Portland, OR; Hematology Oncology (E.P.F.), Harold C. Simmons Comprehensive Cancer Center, University of Texas Southwestern Medical Center, Dallas, TX; Cancer Imaging Program (P.M.J.), National Cancer Institute, Rockville, MD; y Department of Veterans Affairs Medical Center (E.A.N.), Portland, OR.

Ir a [Neurology.org](http://Neurology.org) para declaraciones de intereses completas. La información sobre fondos y aquellas declaraciones relevantes para los autores, si existiesen, se encuentran al final del artículo.

las limitaciones de la utilización de nanopartículas SPUOH como agentes de contraste en la RM anatómica y de perfusión en el diagnóstico de enfermedades inflamatorias del SNC y LPSNC. Postulamos que estos agentes pueden mejorar la visualización por RM del LSNC y la enfermedad inflamatoria del SNC, y ayudar a establecer el blanco más informativo en el caso de una biopsia. A diferencia de los ACBG, las SPUOH también pueden ser usadas de forma segura en pacientes con insuficiencia renal.

**MÉTODOS Aprobaciones estándar de protocolo, registros y consentimiento de pacientes.** El estudio fue registrado y aprobado por el comité de revisión institucional de la *Oregon Health & Science University* (eIRB no. 1562). El estudio fue apoyado financieramente por el NIH y se obtuvo un consentimiento informado por escrito de todos los participantes.

**Población del estudio.** Se incluyeron 20 pacientes con LSNC o enfermedad inflamatoria del SNC como parte de un estudio prospectivo que se estaba llevando a cabo. Entre noviembre del 2002 y mayo del 2011 los pacientes elegibles con sospecha de tumor del SNC, enfermedad desmielinizante o cualquier lesión del SNC con un componente inflamatorio, fueron estudiados con RM luego de la administración de SPUOH. Los diagnósticos fueron confirmados histológicamente (n = 19) o por características clínicas y hallazgos radiológicos y posterior mejoría en el seguimiento (n = 1). Los criterios de exclusión fueron reportados previamente.<sup>18,19</sup> Los pacientes VIH positivos que se encontraban recibiendo terapia antirretroviral combinada no fueron incluidos debido a las potenciales interacciones farmacocinéticas con los agentes SPUOH.

**Evaluación por RM.** Todos los estudios de RM fueron realizados en un sistema de RM corporal total 3-tesla (TIM TRIO; Siemens, Erlangen, Alemania) con una bobina transmisora de radiofrecuencia corporal y un receptor de señal con una bobina matriz de 12 canales para la cabeza. Los parámetros específicos de adquisición de la RM se encuentran en la tabla e-1 en el sitio web de *Neurology*® en [www.neurology.org](http://www.neurology.org). El protocolo de imagen consistió en 3 días consecutivos de estudios de RM. El primer día se adquirieron secuencias T1 y T2 pre y post-contraste con gadolinio gadoteridol (III) quelar (ProHance; Bracco Diagnostics Inc., Princeton, NJ), con la excepción de 2 sujetos con insuficiencia renal (tasa de filtración glomerular estimada < 30 mL/min./1,73 m<sup>2</sup>) que no recibieron gadoteridol y en cambio realizaron un protocolo de solo 2 días con el agente de contraste SPUOH. El gadoteridol fue inyectado a través de un bolo EV a una dosis de 0,1 mmol/kg de peso corporal. Al día siguiente se obtuvieron las mismas secuencias de RM usando ferumoxitol (n = 9) (AMAG Pharmaceuticals, Inc., Cambridge, MA) o ferumoxtran-10 (n = 11) (AMAG Pharmaceuticals, Inc.). El ferumoxtran-10 es previo al ferumoxitol, con similares propiedades en la RM. La manufactura de ferumoxtran-10 fue discontinuada cuando el ferumoxitol estuvo disponible. El ferumoxtran-10 (2,6 mg/kg) fue diluido en 90 mL de solución salina e infundido a 4 mL/min. Todas las dosis de contraste habían sido utilizadas en estudios pre clínicos y en humanos previamente.

A los pacientes que recibieron ferumoxitol también se les realizó RM con perfusión dinámica con contraste (PDC) (n = 9) porque el ferumoxitol puede ser administrado en bolo EV rápido. A los 11 pacientes que recibieron ferumoxtran-10 no se les pudo realizar secuencia de perfusión (PWI) porque este agente de contraste no puede ser administrado en bolo EV rápido debido al riesgo de reacciones anafilactoides. La dosis total de ferumoxitol (510 mg) fue diluida en 17 mL de solución salina. Primero, se administraron 75 mg de ferumoxitol como bolo EV durante la adquisición de RM-PDC. Luego los pacientes recibieron la dosis restante (435 mg) durante 15 minutos. Luego de

la administración del agente SPUOH todos los pacientes fueron monitoreados de cerca durante 2 horas. Al tercer día, al menos 22 horas después de la administración del agente SPUOH, se repitieron las secuencias de T1 y T2 para detectar cambios de señal tardíos inducidos por SPUOH. Todos los pacientes tuvieron un seguimiento de 1 mes para buscar posibles reacciones adversas.

**Análisis de imagen.** Las imágenes de cada paciente fueron evaluadas de manera apareada por el mismo neurorradiólogo. La evaluación de las imágenes consistió de los siguientes pasos: 1) cuantificación del número total de lesiones cerebrales con realce en T1 en comparación con el T1 sin contraste; 2) cuantificación de las lesiones cerebrales en T1 y T2, 24 horas después de la administración de SPUOH en comparación con el T1 y el T2 sin contraste y 3) evaluación de las imágenes post-contraste con SPUOH y ACBG buscando enfermedad leptomeníngea.

Todos los datos iniciales de RM-PDC fueron procesados usando el *software* de análisis de imágenes de perfusión Lupe (*Lund University Perfusion Evaluation*, Suecia), el método simple de cálculo basado en la descomposición del valor singular, descrito por Ostergaard et al.,<sup>20</sup> no corregido para la pérdida de contraste. La función arterial fue calculada a través de la arteria cerebral media contralateral a la lesión con realce. Se crearon mapas del volumen sanguíneo cerebral relativo (VSCr) con códigos a color sobre la base de voxels. La sustancia blanca normal en el hemisferio contralateral fue utilizada como referencia interna estándar; los valores de VSCr fueron calculados dividiendo el VSCr máximo en la lesión con realce por el de la sustancia blanca contralateral de apariencia normal.

**RESULTADOS** El resumen de los datos (tabla 1) muestra los resultados comparativos de la RMs con SPUOH y con ACBG. Dos pacientes con insuficiencia renal recibieron solamente contraste basado en SPUOH por el riesgo conocido de fibrosis sistémica nefrogénica (FSN) con ACBG.<sup>17</sup> Nueve de 18 pacientes (50%) que recibieron ambos agentes de contraste mostraron igual número de lesiones con realce en las imágenes de T1 post-contraste al comparar las RMs con ACBG y con SPUOH. Dos de 18 pacientes (11%) que recibieron contraste basado en SPUOH mostraron realce adicional no visible con ACBG. Tres de 18 pacientes (17%) demostraron áreas de realce al recibir ACBG que no se vieron en las imágenes con SPUOH. Cuatro de 18 pacientes (22%) no mostraron realce con ningún agente.

Las RMs post-contraste de 15 pacientes con neoplasia linfóide del SNC, ya sea enfermedad linfoproliferativa post trasplante (ELPT) o LSNC, también fueron revisadas buscando enfermedad leptomeníngea. Dos pacientes mostraron realce leptomeníngeo localizado en las imágenes post-SPUOH alrededor del sitio del tumor primario, pero solo uno de ellos mostró realce leptomeníngeo comparable con ACBG. No observamos realce leptomeníngeo difuso en ningún caso.

Nueve pacientes que recibieron ferumoxitol pudieron realizar RM de perfusión y se les determinó el valor de VSCr. Ocho de estos 9 pacientes tuvieron lesiones con realce aptas para calcular VSCr, mientras que 1 paciente post-terapia no las tuvo. Los valores de VSCr en el LSNC y la ELPT fueron variables y se encontraron en un rango de entre 1,3 y 4,1 mientras que las lesiones desmielinizantes demostraron bajo VSCr por debajo de 1,0.

**Tabla 1** Resumen de datos<sup>a</sup>

| Paciente            | Diagnóstico                            | No. de RMs | Lesiones con realce con ACBG | Lesiones con realce con SPUOH | Volumen sanguíneo cerebral relativo + SPUOH |
|---------------------|----------------------------------------|------------|------------------------------|-------------------------------|---------------------------------------------|
| 1 (figura 1)        | LPSNC                                  | 1          | 3                            | 3                             | 2,3                                         |
| 2 (figura 2, A-C)   | EM                                     | 1          | 1                            | 1                             | 0,3                                         |
| 3 (figura 2, D y E) | ELPT                                   | 1          | 1                            | 1                             | 1,3                                         |
| 4 (figura 3)        | Encefalomiелitis aguda desmielinizante | 1          | No realizada                 | 1                             | 0,9                                         |
| 5 (figura 2, F-I)   | Desmielinización tumefacta             | 1          | 3                            | 3                             | 0,4                                         |
| 6 (figura 4)        | ELPT                                   | 2          | 6                            | 4,3                           | 2,1                                         |
| 7                   | Infiltrado linfoide <sup>b</sup>       | 1          | No realizada                 | 0                             |                                             |
| 8                   | Encefalitis crónica                    | 1          | 3                            | 5                             |                                             |
| 9                   | LPSNC                                  | 1          | 5                            | 5                             |                                             |
| 10                  | LPSNC                                  | 1          | 5                            | 0                             |                                             |
| 11                  | ELPT                                   | 3          | 2                            | 2                             | 4,1                                         |
| 12                  | LPSNC                                  | 1          | 1                            | 1                             |                                             |
| 13                  | LPSNC                                  | 1          | 0                            | 2                             |                                             |
| 14                  | LSNC <sup>b</sup>                      | 1          | 0                            | 0                             | Sin lesión; post-tto.                       |
| 15                  | LPSNC                                  | 1          | 1                            | 1                             |                                             |
| 16                  | LPSNC                                  | 1          | 0                            | 0                             |                                             |
| 17                  | LPSNC                                  | 1          | 0                            | 0                             |                                             |
| 18                  | LPSNC                                  | 1          | Muchas                       | Muchas                        | 1,4                                         |
| 19                  | LPSNC                                  | 1          | 0                            | 0                             |                                             |
| 20                  | LPSNC                                  | 1          | 3                            | 2                             |                                             |

Abreviaturas: ACBG = agente de contraste basado en gadolinio; ELPT = enfermedad linfoproliferativa post-trasplante; EM = esclerosis múltiple; LPSNC = linfoma primario del SNC; LSNC = linfoma del SNC; SPUOH = nanopartícula superparamagnética ultrapequeña de óxido de hierro; tto. = tratamiento.

<sup>a</sup> Se realizaron estudios de imagen a 20 pacientes con enfermedad inflamatoria del SNC. No hubo toxicidades significativas en ningún paciente tratado con SPUOH. Los números separados por comas representan el número de lesiones con realce con contraste luego de las imágenes consecutivas. La última columna muestra el volumen sanguíneo cerebral relativo de los pacientes que realizaron imágenes de perfusión luego de la administración de ferumoxitol.

<sup>b</sup> Paciente con antecedente de linfoma sistémico.

**Varias observaciones resaltan la utilización potencial de estudios de contraste basados en SPUOH. Escenario 1: Mejoría en el objetivo de una biopsia quirúrgica. Caso 1.** Como ejemplo de la intensa marcación con hierro usando el contraste basado en SPUOH comparado con el ACBG, evaluamos una mujer de 59 años de edad que presentó deterioro progresivo de la memoria y confusión (tabla 1, paciente 1). Una RM inicial con ACBG mostró lesiones profundas en sustancia blanca multifocales con intenso realce, consistente con enfermedad desmielinizante o LPSNC (figura 1B). Estudios citológicos no diagnósticos impulsaron la realización de RM basada en SPUOH. Las imágenes de T1 mostraron patrones similares de realce con contraste entre las imágenes de ACBG y SPUOH (figura 1, B y C). Las imágenes de T2 (figura 1, D y E) resaltan diferencias clave entre el contraste basado en SPUOH y el ACBG. Luego de la administración de SPUOH, la captación de hierro por las células inflamatorias se observa como una imagen hipointensa en los centros de las lesiones (figura 1E), que de otra manera serían hiperintensas en la secuencia de T2 sin contraste (figura 1D). La paciente fue sometida a una biopsia estereotáxica con aguja de la lesión hipointensa frontal derecha observada en la secuencia

de T2 post-ferumoxitol, lo que confirma la sospecha diagnóstica de linfoma difuso de células B grandes.

**Caso 2.** Una mujer de 30 años de edad con historia de varias semanas de fatiga fue referida con un diagnóstico provisional de LSNC (tabla 1, paciente 2). El examen neurológico mostró inestabilidad en la marcha. La RM mostró un área de señal anormal en T2 y realce en la sustancia blanca profunda frontal derecha y los ganglios basales, extendiéndose al hipotálamo, en las secuencias de T1 post-ACBG (figura 2, A y B). Luego de una punción lumbar no diagnóstica, se realizó una biopsia estereotáxica con aguja en la zona de realce de la secuencia de T1 post-ACBG. La evaluación histológica mostró solo gliosis. Luego a la paciente se le realizó una RM con SPUOH. Las imágenes de secuencia de T1 con ferumoxitol mostraron un patrón de realce similar en comparación al de ACBG. Sin embargo, las imágenes de SPUOH revelaron un foco hipointenso en las imágenes de T2 que no fue observable en las imágenes con ACBG (figura 2C). Luego se le realizó una nueva biopsia estereotáxica del área de señal hipointensa observada en la secuencia de T2, que reveló desmielinización con axones intactos, lo que sugiere el diagnóstico de esclerosis múltiple.

Figura 1 RM del paciente con LPSNC

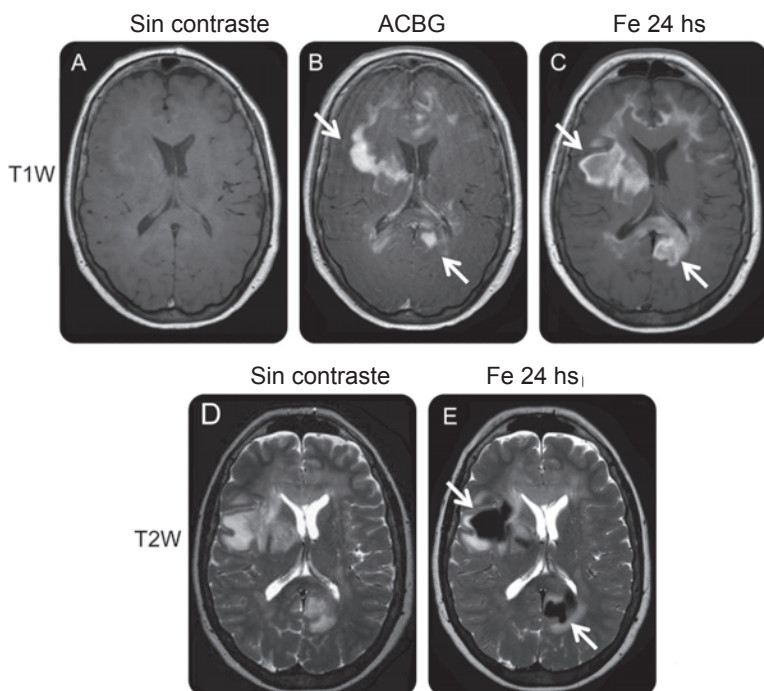

RM del caso 1. (A) Secuencia de T1 sin agente de contraste. (B) Secuencia de T1 luego de la administración de ACBG que muestra lesiones profundas en la sustancia blanca, multifocales, con realce (flechas) sugiriendo LPSNC. Nótese, sin embargo, que el relativamente mínimo efecto de masa para la extensión de la lesión y el realce incompleto son más típicos de una enfermedad desmielinizante. (C) Secuencia de T1 24 hs después de la administración de contraste SPUOH que muestra un realce más extenso que el de la imagen con ACBG, debido a la captación fagocítica celular (flechas). (D) Secuencia de T2 sin contraste que muestra áreas multifocales confluentes hiperintensas en la sustancia blanca. (E) Secuencia de T2 24 hs después del ferumoxitol que muestra múltiples áreas de intensa captación de SPUOH (flechas). ACBG = agente de contraste basado en gadolinio; LPSNC = linfoma primario del SNC; SPUOH = nanopartícula superparamagnética ultrapequeña de óxido de hierro.

**Escenario 2: Evitando la FSN.** La FSN es una complicación idiopática y potencialmente fatal que puede ocurrir luego de la administración de gadolinio en pacientes con insuficiencia renal. El mecanismo propuesto para el desarrollo de la fibrosis involucra el deterioro de la filtración renal de ACBG, lo que resulta en una acumulación en la piel y otros órganos. El resultado final es la fibrosis multiorgánica que provoca contracturas de piel, prurito intenso y potencial insuficiencia cardíaca y respiratoria.<sup>17</sup> El riesgo de FSN llevó a la FDA de los EE.UU. a recomendar no dar ACBG a ningún paciente con una filtración glomerular estimada menor a 30 mL/min./1,73 m<sup>2</sup> o a ningún trasplantado renal – una política a la que adhieren la mayoría de los radiólogos practicantes y que fue adoptada por el *American College of Radiology*.<sup>21</sup> Por lo tanto, los SPUOH, que ya son utilizados como reemplazo de hierro en los pacientes en diálisis, son una alternativa atractiva a los ACBG en estos pacientes.

**Caso 3.** Para evitar las consecuencias potenciales de la FSN, incluimos a un paciente de 67 años de edad con sospecha de ELPT del SNC en el protocolo de RM basada en SPUOH (tabla 1, paciente 3). Las imágenes adquiridas antes del tratamiento (figura 2D) mostraron una masa frontal izquierda con realce

consistente con ELPT, confirmada por biopsia. Previamente se había realizado una RM con ACBG (en otra institución, a pesar de su antecedente de trasplante renal) y esta mostraba una apariencia similar; sin embargo, el uso subsecuente de contraste basado en SPUOH, le permitió tener un seguimiento posterior sin riesgo de FSN. La RM basada en SPUOH, repetida 1 año después de la biopsia (figura 2E), mostró una excelente respuesta a la monoterapia con rituximab.

**Escenario 3: Correlacionando el volumen sanguíneo cerebral con la inflamación del SNC.** **Caso 4.** Una mujer de 23 años de edad se presentó con una hemianopsia homónima derecha y una lesión occipital izquierda de rápida expansión en la RM estándar con ACBG (tabla 1, paciente 5; figura 2G). Se planeó una craneotomía para reseca la lesión. Antes de la cirugía fue evaluada con imágenes basadas en SPUOH con perfusión y estas mostraron un bajo volumen sanguíneo (VSCr = 0,4; figura 2I). Debido a que la imagen basada en ACBG sugería que la masa era una neoplasia de alto grado, pero se encontró un bajo volumen sanguíneo en las imágenes de perfusión, se tomó la decisión de realizar una biopsia con aguja. La biopsia reveló destrucción de la mielina con axones intactos y los estudios de LCR mostraron bandas oligoclonales con aumento de la tasa de síntesis de inmunoglobulina G. El equipo neurológico trató su desmielinización tumefacta.

**Caso 5.** Un hombre de 30 años de edad con enfermedad renal terminal debido a diabetes tipo 1 no controlada (creatinina sérica = 3,0 mg/dL) se presentó con cefaleas episódicas y alteración de la conciencia, pero estaba neurológicamente intacto al momento de su presentación (tabla 1, paciente 4). La RM sin contraste reveló una lesión expansiva en la protuberancia. La RM con ACBG fue contraindicada por el riesgo de FSN. Se le realizó una RM antes y 24 horas después de la administración de ferumoxitol (figura 3, A y B); las imágenes de contraste SPUOH mostraron intensa captación en la protuberancia, que se correlaciona con la hiperintensidad en la secuencia de T2 de las imágenes previas a la administración de contraste (figura 3C). Las imágenes de T2 luego de la administración de SPUOH mostraron un foco hiperintenso (figura 3D). La RM de perfusión basada en SPUOH demostró bajo volumen sanguíneo (VSCr = 0,9) (figura 3E), cuya interpretación favoreció el diagnóstico de una patología no neoplásica. Para no realizar una biopsia con su potencial morbilidad, se realizó un seguimiento por RM a las 6 semanas y a los 6 meses, mostrando que la lesión había involucionado. El diagnóstico presuntivo realizado por los neurólogos consultados fue una encefalomiелitis aguda desmielinizante.

**Escenario 4: Limitaciones potenciales de las imágenes luego de la administración de SPUOH—LSNC y tromboembolismo venoso.** **Caso 6.** Una mujer de 63 años de edad se realizó una RM basada en SPUOH como parte de la evaluación de una ELPT en tronco cerebral (tabla 1, paciente 6). Las imágenes de T2 24 horas después de la administración de SPUOH mostraron una señal marcadamente hipointensa, sugiriendo una intensa captación de hierro por las células linfoides (figura 4B)



Figura 2 Imágenes SPUOH de inflamación del SNC

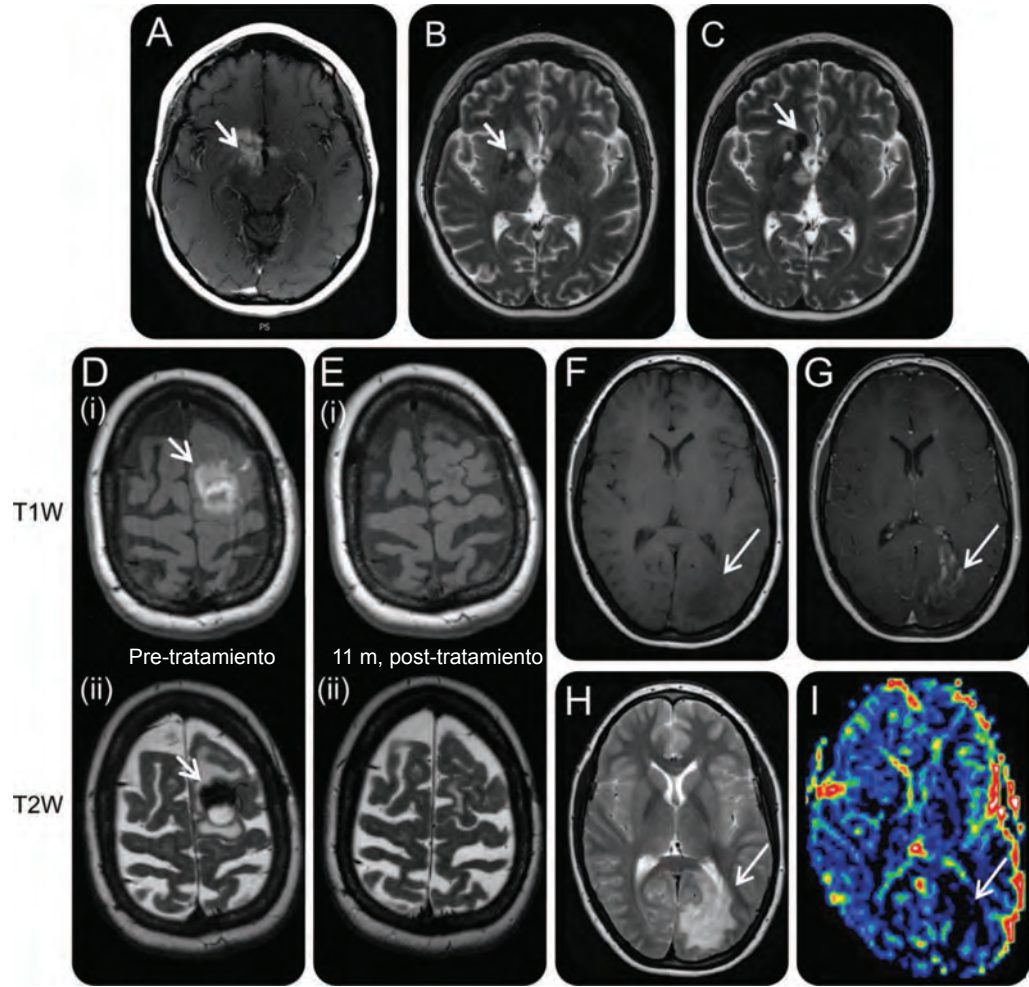

(A–C) RM del caso 2. (A) Secuencia de T1 que muestra el realce del ACBG en los ganglios basales inferiores derechos y el hipotálamo (flecha). (B) Secuencia de T2 sin contraste que muestra el primer sector para biopsia (flecha) marcado por el realce con ACBG en las imágenes de T1. (C) Secuencia de T2 24 hs después de la administración de ferumoxitol que muestra un área marcadamente hipointensa, sugiriendo el área de mayor captación de hierro (flecha), que fue el objetivo de la segunda biopsia, que reveló desmielinización. (D y E) RM del caso 3, un paciente con ELPT. (D) Imágenes pre-tratamiento: secuencia de T1 (i) y T2 (ii) 24 hs después de la administración de ferumoxitol. Las flechas muestran áreas de intensa captación de hierro en ambas secuencias. (E) Imágenes post-tratamiento: secuencia de T1 (i) y T2 (ii) 24 hs después de la administración de ferumoxitol que muestran la desaparición del realce y del efecto de masa. (F–I) RM del caso 4. (F) Secuencia de T1 axial pre-contraste que muestra una leve hipointensidad (flecha) y efecto de masa en el lóbulo occipital. (G) Secuencia de T1 axial post-ACBG que muestra un realce parcheado marginal nodular (flecha) con sospecha de malignidad de alto grado. (H) Secuencia de T2 axial pre-contraste que muestra edema vasogénico consistente con glioma de alto grado. (I) Mapa de VSCr obtenido luego de la administración de contraste SPUOH que muestra bajo VSCr (flecha) en la lesión, que sería atípico para un glioma de alto grado. La biopsia confirmó el diagnóstico de desmielinización tumefacta. ACBG = agente de contraste basado en gadolinio; ELPT = enfermedad linfoproliferativa post-trasplante; SPUOH = nanopartícula superparamagnética ultrapequeña de óxido de hierro; VSCr = volumen sanguíneo cerebral relativo.

y el diagnóstico fue confirmado por biopsia. La paciente toleró bien el tratamiento de la ELPT y se mantuvo neurológicamente estable. Un mes después del tratamiento desarrolló una trombosis venosa profunda; se realizó una RM (sin contraste) antes de iniciar la anticoagulación. La secuencia de T2 mostró una hipointensidad focal (figura 4C) compatible con hemorragia de tronco. Esto llevó a la colocación de un filtro EV en lugar de iniciar la terapia anticoagulante. Sin embargo, es importante reconocer que la hemorragia de tronco era altamente improbable basado en el examen neurológico de la paciente. Estos hallazgos se interpretaron

como contraste SPUOH residual, debido a que el patrón de señal era similar, aunque relativamente disminuido, al de la RM previa al ferumoxitol, con un efecto de masa global reducido. La TC sin contraste realizada en menos de 24 horas no mostró hiperdensidad en el tronco que sugiriera hemorragia. La RM (sin contraste) realizada a los 3 meses mostró mayor decremento en la hipointensidad en la secuencia de T2 (figura 4D).

**DISCUSIÓN** La RM con realce con SPUOH ofrece un número de ventajas potenciales por sobre la RM convencional con realce con ACBG en el esquema

Figura 3 RM del paciente con cefaleas y estado mental alterado, imposibilitado de recibir ACBG debido a insuficiencia renal

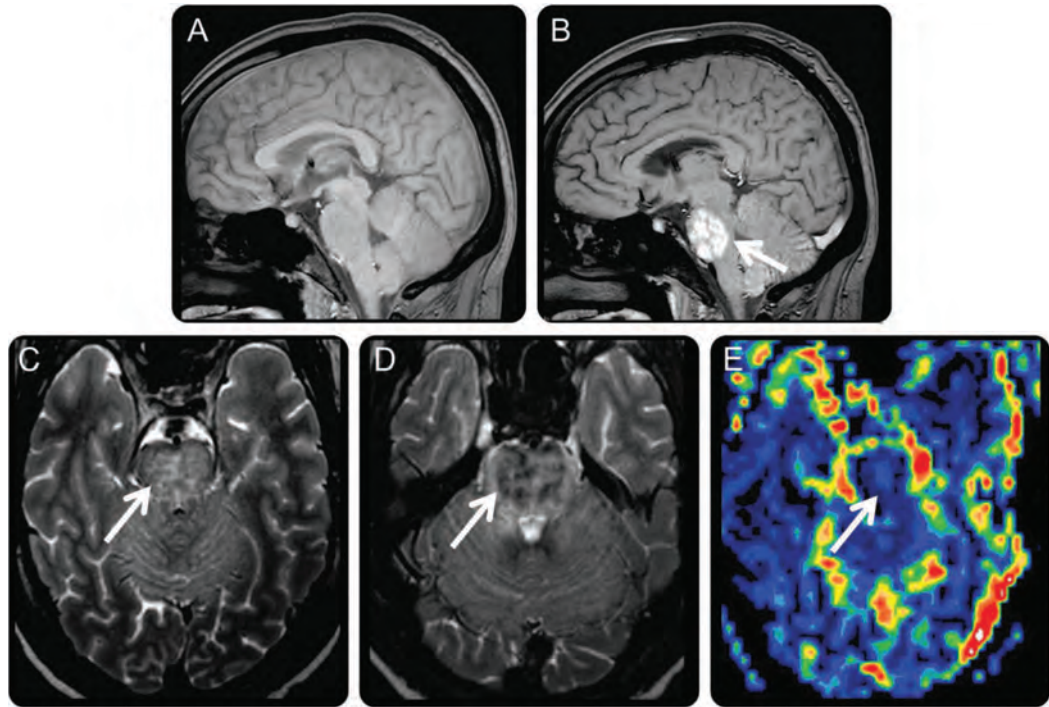

RM del caso 5. (A) Secuencia de T1 pre-contraste que muestra una ligera expansión pontina y leve decremento en la señal general. (B) Secuencia de T1 sagital 24 hs post-SPUOH que muestra intensa captación en la protuberancia (flecha). (C) Secuencia de T2 axial pre-contraste que muestra señal aumentada parcheada en la protuberancia (flecha). (D) Imagen 24 hs post-SPUOH que muestra hipointensidades parcheadas en la protuberancia (flecha) en correlación con la captación de hierro. (E) Imagen de perfusión PDC basada en SPUOH que muestra bajo VSCr central en la protuberancia (flecha), correspondiendo al área de realce anormal similar a la apariencia de la sustancia blanca normal. ACBG = agente de contraste basado en gadolinio; PDC = perfusión dinámica con contraste; SPUOH = nanopartícula superparamagnética ultrapequeña de óxido de hierro; VSCr = volumen sanguíneo cerebral relativo.

diagnóstico del LSNC y lesiones inflamatorias intracranianas similares a las neoplasias. En primer lugar, la RM con realce de tipo SPUOH puede ofrecer áreas de realce diferentes o adicionales que pueden ofrecer mejor localización de objetivos quirúrgicos. Esto puede ser especialmente verdad en el caso de secuencias de T2 de RM con SPUOH, que pueden ofrecer un sitio alternativo para muestras de biopsia, en comparación con las secuencias T1 post-contraste convencional con ACBG. En segundo lugar, la PDC PWI basada en ferumoxitol puede ofrecer una diferenciación entre enfermedades inflamatorias como las desmielinización de los trastornos neoplásicos. En tercer lugar, los SPUOH pueden ser utilizados de forma segura en pacientes con insuficiencia renal que no pueden recibir ACBG.

Basándonos en nuestro trabajo previo, la RM inmediata a SPUOH muestra realce parenquimatoso intravascular no anormal.<sup>22-24</sup> El segundo día de imagen a las 24 horas muestra un realce predominantemente intracelular (y/o intersticial) más que intravascular, ya que el ferumoxitol tiene una vida media intravascular de aproximadamente 14 a 20 horas.<sup>25</sup> Esto fue de ayuda en un paciente de esta serie que requirió una segunda biopsia diagnóstica en la cual se eligió un diferente objetivo quirúrgico basado en la secuencia de T2 de la RM basada en SPUOH.

Estudios pre clínicos en modelos animales han mostrado a través de análisis histológicos que los focos hipointensos en la secuencia de T2 tardía de cerebro (24 horas) corresponden a la marcación de hierro en las células fagocíticas (tales como los macrófagos), y se están realizando esfuerzos para confirmar estos hallazgos en biopsias humanas.<sup>25,26</sup> El realce parenquimatoso anormal con ACBG, por otro lado, es debido a un aumento en la permeabilidad vascular por la ruptura de la barrera hemoencefálica.<sup>25</sup> Futuros estudios deberán confirmar la localización de ferumoxitol en tejidos humanos. Determinar si la localización se encuentra principalmente en las células fagocíticas (intracelular) o en el intersticio (debido a una difusión extravascular más lenta en comparación a los ACBG) continúa siendo un proyecto en curso.

Los estudios de perfusión del tipo PDC en esta serie estuvieron basados solo en ferumoxitol porque este puede administrarse a través de un bolo EV sin riesgo de reacciones anafilactoides debido a la desgranulación de mastocitos, que era común en preparados previos de nanopartículas de óxido de hierro, tales como el ferumoxtran-10. En la literatura, la PWI basada en PDC del LSNC ha mostrado diferentes resultados usando ACBG, con valores solapados con respecto al glioma maligno en estudios publicados.<sup>14</sup> Nuestros re-



**Figura 4** Secuencias de T2 del paciente con ELPT que muestran una duración prolongada de la marcación con hierro

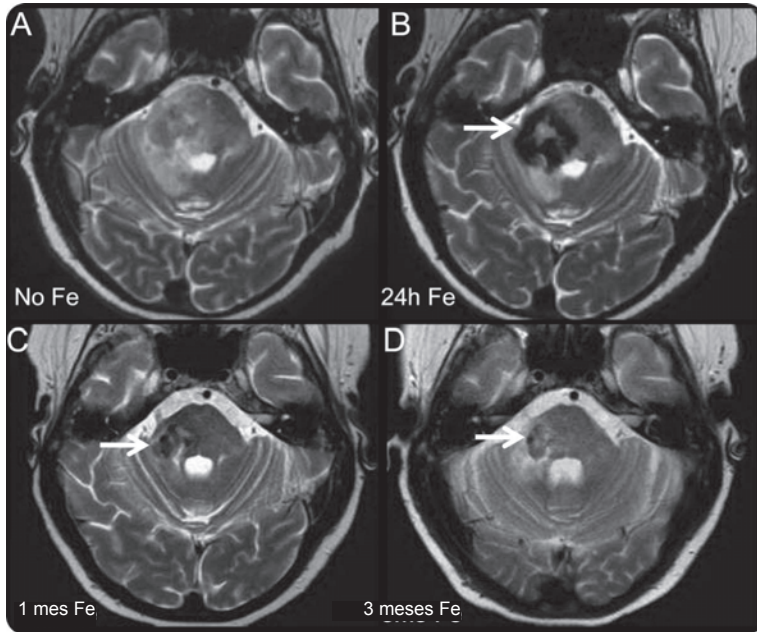

RM del caso 6. (A) Imagen pre-tratamiento sin contraste que muestra un aumento anormal de la señal T2 y mínimo efecto de masa en la protuberancia y el hemisferio cerebeloso derecho. (B) Secuencia de T2 24 hs después de la imagen inicial de ferumoxitol que muestra intensa captación de hierro (flecha). Reimpreso con el permiso de la *American Journal of Roentgenology*.<sup>19</sup> (C) Luego de 1 mes, luego del diagnóstico de trombosis venosa profunda, al paciente se le realiza otra RM sin contraste. Inicialmente las áreas hipointensas en T2 (flecha) fueron malinterpretadas como hemorragia de tronco asintomática, pero probablemente representan células inflamatorias residuales marcadas con hierro, ya que la TC sin contraste no mostró hiperdensidad en el tronco encefálico (no mostrada). (D) Persistencia de señal puntiforme hipointensa en T2 (flecha), pero reducida 3 meses después de la administración de ferumoxitol. ELPT = enfermedad linfoproliferativa post-trasplante.

sultados son consistentes con los hallazgos reportados, en los cuales las lesiones desmielinizantes o inflamatorias muestran bajo VSCR<sup>27</sup>, mientras que el LSNC demuestra VSCR modestamente elevado, y no permite una diferenciación confiable del glioma de alto grado.<sup>12</sup> Nuestra experiencia con PDC basada en ferumoxitol en gliomas malignos ha mostrado mayor confiabilidad que la PDC PWI basada en ACBG. La PDC basada en SPUOH no requiere ni algoritmos de *software* costosos de correlación de difusión, ni precargas con dosis adicionales de SPUOH, como puede ser necesario con los ACBG.<sup>24</sup> Nuestro número limitado de PWI en casos de LSNC en esta serie no permite una generalización, pero será objeto de un estudio futuro.

Dos sujetos en esta serie se realizaron RM con realce con SPUOH porque no podían recibir ACBG debido al riesgo de FSN. Esta situación puede ser particularmente problemática para pacientes trasplantados renales, que tiene riesgo tanto de FSN como de ELPT, debido a la inmunosupresión. La RM con ferumoxitol ofrece una oportunidad diagnóstica sin los riesgos previos.

Las limitaciones de la RM con SPUOH incluyen las siguientes: 1) requerimiento de al menos 2 días consecutivos de imágenes para obtener secuencias anatómicas con realce similar a las de la RM con ACBG, 2) la RM con PDC basada en ferumoxitol, de forma similar a la RM PDC basada en ACBG, continúa sin

poder discriminar entre neoplasias malignas linfoides y gliales, y 3) la persistencia potencial del realce de SPUOH por varios meses puede confundirse con hemorragia. Sin embargo, el aumento en el uso de imágenes con agentes SPUOH a lo largo del tiempo seguramente resulte en un reconocimiento de esta posibilidad. Seguramente debido a este efecto poco común, el paquete de ferumoxitol advierte a los prescriptores que el compuesto puede “alterar estudios de RM” durante hasta 3 meses.<sup>28</sup> Sin embargo, el gobierno federal de los EE.UU. continúa apoyando económicamente múltiples estudios clínicos que investigan las aplicaciones de ferumoxitol en imágenes de RM.<sup>29</sup> Esta advertencia lamentablemente lleva a creer que la administración de ferumoxitol está contraindicada, cuando de hecho lo deseable puede ser una RM. Sin embargo, los clínicos y radiólogos deberían ser advertidos sobre cualquier administración previa de SPUOH, para poder interpretar correctamente los estudios de RM. La TC de encéfalo sin contraste puede también resolver cualquier pregunta sobre hemorragia, como en el caso presentado aquí.

Nuestra experiencia resalta los beneficios y limitaciones del uso de RM basada en SPUOH, que aporta información relevante en la inflamación y las enfermedades neoplásicas del SNC.<sup>24,30</sup> Nuestros hallazgos preliminares de imágenes con realce por SPUOH en LSNC requieren mayor evaluación en estudios que involucren el linfoma sistémico. Y de gran importancia, las imágenes de SPUOH aportan una alternativa segura de RM en pacientes con insuficiencia renal. Sobre la base de estos hallazgos, la FDA de los EE.UU. debería apoyar, y no limitar, un mayor uso de los agentes SPUOH en la realización de RM.

#### CONTRIBUCIONES DE LOS AUTORES

B. Farrell y B. Hamilton: revisión crítica del contenido intelectual importante, análisis e interpretación. E. Dósa, E. Rimely, M. Nasser y S. Gahramanov: análisis e interpretación, adquisición de datos. C. Lacy: adquisición de datos. E. Frenkel, N. Doolittle, y P. Jacobs: revisión crítica del manuscrito del contenido intelectual importante. E. Neuwelt: revisión crítica del manuscrito del contenido intelectual importante y supervisión del estudio.

#### RECONOCIMIENTOS

Los autores agradecen a Aliana Culp por su asistencia con el procesamiento del manuscrito.

#### FONDOS PARA EL ESTUDIO

Este trabajo fue apoyado por la beca de mérito de la *Veterans Administration* y por las becas del NIH NS53468, NS44687 y CA137488, en parte con fondos federales del *National Cancer Institute*, NIH, bajo el contrato no. HHSN261200800001E y por la Walter S. and Lucienne Driskill Foundation a E.A.N.

#### DECLARACIÓN DE INTERESES

B. Farrell, B. Hamilton, E. Dósa, E. Rimely, M. Nasser, S. Gahramanov, C. Lacy, E. Frenkel, N. Doolittle y P. Jacobs no tienen nada que declarar. Los estudios de E. Neuwelt's que involucran ferumoxitol fueron financiados completamente por las becas de investigación de la *Veterans Administration* y NIH, con algunas nanopartículas SPUOH donadas por AMAG Pharmaceuticals. A la luz de los resultados de este estudio, y luego de haber completado el manuscrito, la Oregon Health & Science University recibió el apoyo económico a la investigación del AMAG para conducir ensayos clínicos de RM con ferumoxitol. Ninguno de los autores tiene interés financiero en este agente o su desarrollador, AMAG. Ir a Neurology.org para declaraciones completas.

Recibido el 30 de agosto de 2012. Aceptado en su formato final el 2 de abril de 2013.

## BIBLIOGRAFÍA

1. Abba O, Weitzman S, Blay JY, et al. Primary CNSL in children and adolescents: a descriptive analysis from the International Primary CNSL Collaborative Group (IPCG). *Clin Cancer Res* 2011;17:346–352.
2. Abrey LE, Batchelor TT, Ferreri AJ, et al. Report of an international workshop to standardize baseline evaluation and response criteria for primary CNSL. *J Clin Oncol* 2005;23:5034–5043.
3. Blay JY. Primary cerebral non-Hodgkin lymphoma in non-immunocompromised subjects [in French]. *Bull Cancer* 1997;84:976–980.
4. Cavaliere R, Petroni G, Lopes MB, Schiff D. Primary central nervous system post-transplantation lymphoproliferative disorder: an International Primary Central Nervous System Lymphoma Collaborative Group Report. *Cancer* 2010;116:863–870.
5. Doolittle ND, Abrey LE, Shenkier TN, et al. Brain parenchyma involvement as isolated central nervous system relapse of systemic non-Hodgkin lymphoma: an International Primary CNSL Collaborative Group Report. *Blood* 2008;111:1085–1093.
6. Fine HA, Mayer RJ. Primary central nervous system lymphoma. *Ann Intern Med* 1993;119:1093–1104.
7. Herrlinger U, Schabet M, Clemens M, et al. Clinical presentation and therapeutic outcome in 26 patients with primary CNSL. *Acta Neurol Scand* 1998;97:257–264.
8. Hochberg FH, Miller DC. Primary central nervous system lymphoma. *J Neurosurg* 1988;68:835–853.
9. Rock JP, Cher L, Hochberg FH, Test AB. Central nervous system lymphomas in AIDS and non-AIDS patients. In: Youmans JR, editor. *Neurological Surgery*, 4th ed. Philadelphia: WB Saunders; 1995.
10. Angelov L, Doolittle ND, Kraemer DF, et al. Blood-brain barrier disruption and intra-arterial methotrexate-based therapy for newly diagnosed primary CNSL: a multi-institutional experience. *J Clin Oncol* 2009;27:3503–3509.
11. Buhning U, Herrlinger U, Krings T, Thiex R, Weller M, Kuker W. MRI features of primary central nervous system lymphomas at presentation. *Neurology* 2001;57:393–396.
12. Law M, Cha S, Knopp EA, Johnson G, Arnett J, Litt AW. High-grade gliomas and solitary metastases: differentiation by using perfusion and proton spectroscopic MR imaging. *Radiology* 2002;222:715–721.
13. Lee IH, Kim ST, Kim HJ, Kim KH, Jeon P, Byun HS. Analysis of perfusion weighted image of CNSL. *Eur J Radiol* 2010;76:48–51.
14. Tang YZ, Booth TC, Bhogal P, Malhotra A, Wilhelm T. Imaging of primary central nervous system lymphoma. *Clin Radiol* 2011;66:768–777.
15. Morris PG, Abrey LE. Therapeutic challenges in primary CNSL. *Lancet Neurol* 2009;8:581–592.
16. Soussain C, Ricard D, Fike JR, Mazon JJ, Psimaras D, Delattre JY. CNS complications of radiotherapy and chemotherapy. *Lancet* 2009;374:1639–1651.
17. Neuwelt EA, Hamilton BE, Varallyay CG, et al. Ultra-small superparamagnetic iron oxides (USPIOs): a future alternative magnetic resonance (MR) contrast agent for patients at risk for nephrogenic systemic fibrosis (NSF)? *Kidney Int* 2009;75:465–474.
18. Dosa E, Guillaume DJ, Haluska M, et al. Magnetic resonance imaging of intracranial tumors: intra-patient comparison of gadoteridol and ferumoxytol. *Neuro Oncol* 2011;13:251–260.
19. Hamilton BE, Nesbit GM, Dosa E, et al. Comparative analysis of ferumoxytol and gadoteridol enhancement using T1- and T2-weighted MRI in neuroimaging. *AJR Am J Roentgenol* 2011;197:981–988.
20. Ostergaard L, Sorensen AG, Kwong KK, Weisskoff RM, Gyldensted C, Rosen BR. High resolution measurement of cerebral blood flow using intravascular tracer bolus passages. Part II: experimental comparison and preliminary results. *Magn Reson Med* 1996;36:726–736.
21. Kanal E, Barkovich AJ, Bell C, et al. ACR guidance document for safe MR practices: 2007. *AJR Am J Roentgenol* 2007;188:1447–1474.
22. Gahramanov S, Raslan AM, Muldoon LL, et al. Potential for differentiation of pseudoprogression from true tumor progression with dynamic susceptibility-weighted contrast-enhanced magnetic resonance imaging using ferumoxytol vs. gadoteridol: a pilot study. *Int J Radiat Oncol Biol Phys* 2011;79:514–523.
23. Gahramanov S, Muldoon LL, Li X, Neuwelt EA. Improved perfusion MR imaging assessment of intracerebral tumor blood volume and antiangiogenic therapy efficacy in a rat model with ferumoxytol. *Radiology* 2011;261:796–804.
24. Gahramanov S, Muldoon LL, Varallyay CG, et al. Pseudoprogression of glioblastoma after chemo- and radiation therapy: diagnosis by using dynamic susceptibility-weighted contrast-enhanced perfusion MR imaging with ferumoxytol versus gadoteridol and correlation with survival. *Radiology* 2013;266:842–852.
25. Weinstein JS, Varallyay CG, Dosa E, et al. Superparamagnetic iron oxide nanoparticles: diagnostic magnetic resonance imaging and potential therapeutic applications in neurooncology and central nervous system inflammatory pathologies: a review. *J Cereb Blood Flow Metab* 2010;30:15–35.
26. Schroeter M, Saleh A, Wiedermann D, Hoehn M, Jander S. Histochemical detection of ultrasmall superparamagnetic iron oxide (USPIO) contrast medium uptake in experimental brain ischemia. *Magn Reson Med* 2004;52:403–406.
27. De Keyser J, Steen C, Mostert JP, Koch MW. Hypoperfusion of the cerebral white matter in multiple sclerosis: possible mechanisms and pathophysiological significance. *J Cereb Blood Flow Metab* 2008;28:1645–1651.
28. Feraheme [package insert]. Lexington, MA: AMAG Pharmaceuticals, Inc.; 2012.
29. Neuwelt EA, Varallyay CG, Manninger S, et al. The potential of ferumoxytol nanoparticle magnetic resonance imaging, perfusion, and angiography in central nervous system malignancy: a pilot study. *Neurosurgery* 2007;60:601–611.
30. Tourdias T, Roggerone S, Filippi M, et al. Assessment of disease activity in multiple sclerosis phenotypes with combined gadolinium- and superparamagnetic iron oxide-enhanced MR imaging. *Radiology* 2012;264:225–233.
